# Supplementary material
Source: ML conference proceedings conference paper supplement (https://openreview.net/forum?id=fQTlgI2qZqE)

$x_1$  $x_2$  $\vdots$  $x_p$ 

|                                                                                    |                                                                                   |          |                                                                                      |  |
|------------------------------------------------------------------------------------|-----------------------------------------------------------------------------------|----------|--------------------------------------------------------------------------------------|--|
|                                                                                    |                                                                                   |          |                                                                                      |  |
|   |                                                                                   |          |                                                                                      |  |
|   |  |          |                                                                                      |  |
| $\vdots$                                                                           | $\vdots$                                                                          | $\vdots$ |                                                                                      |  |
|  | $\dots$                                                                           | $\dots$  |  |  |

 $x_1$  $x_2$  $\dots$  $x_p$

Supplement: supplementary_material [file attachment]

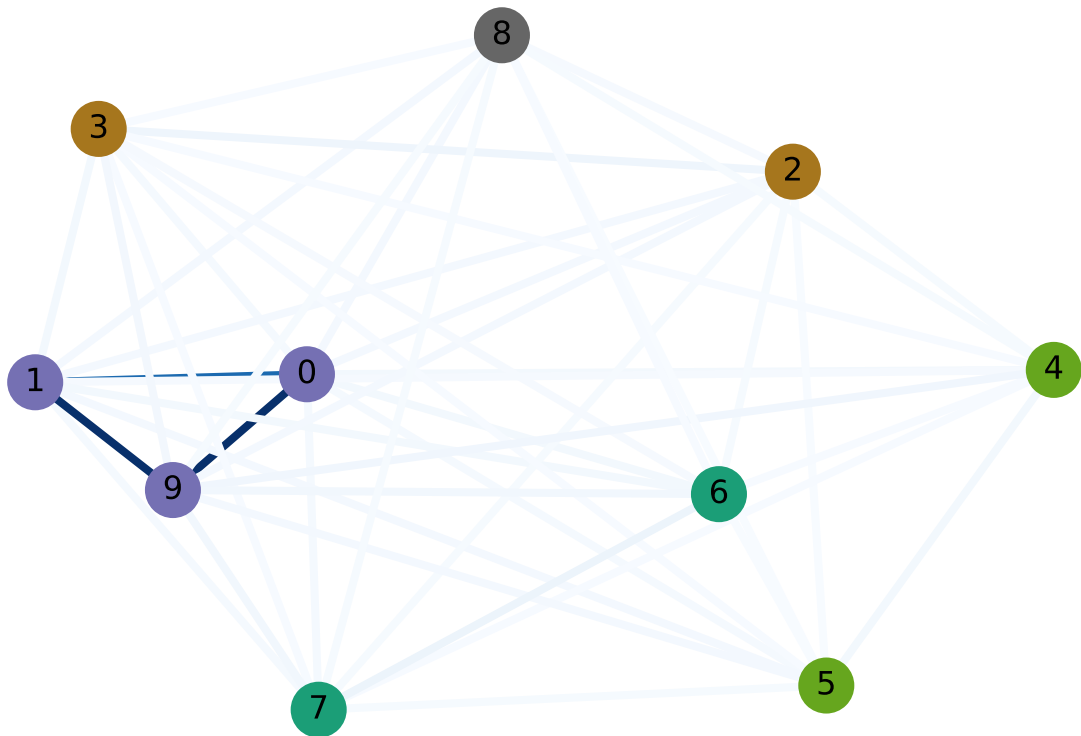

Supplement: supplementary_material [file attachment]

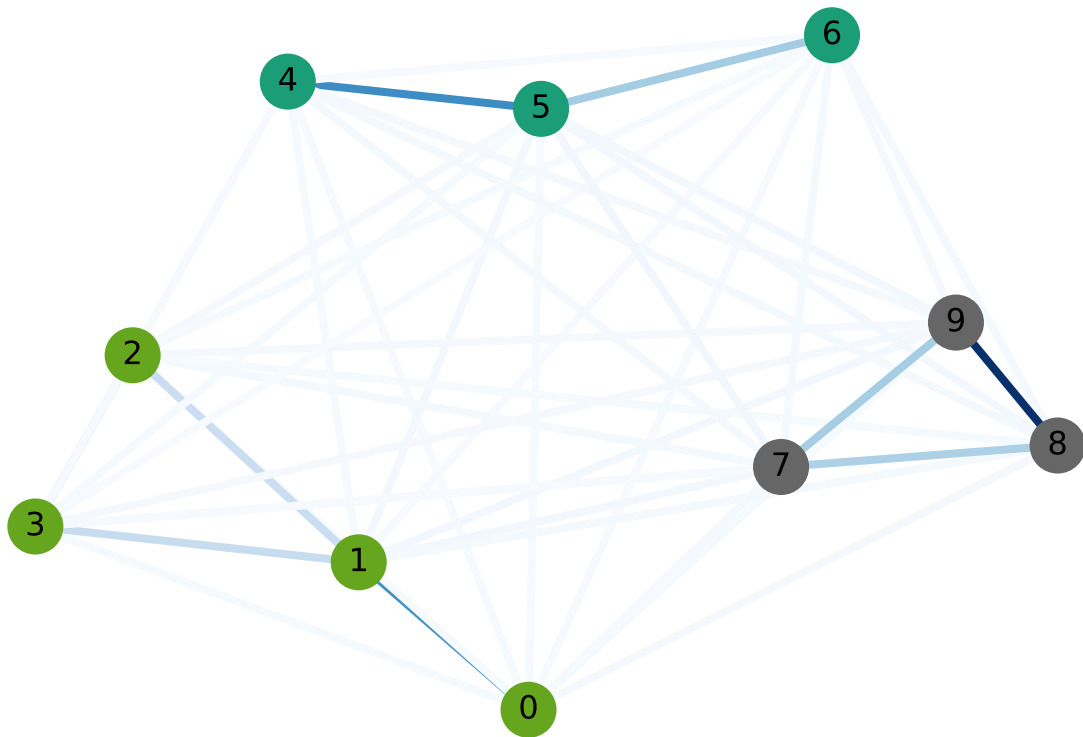

Supplement: supplementary_material [file attachment]

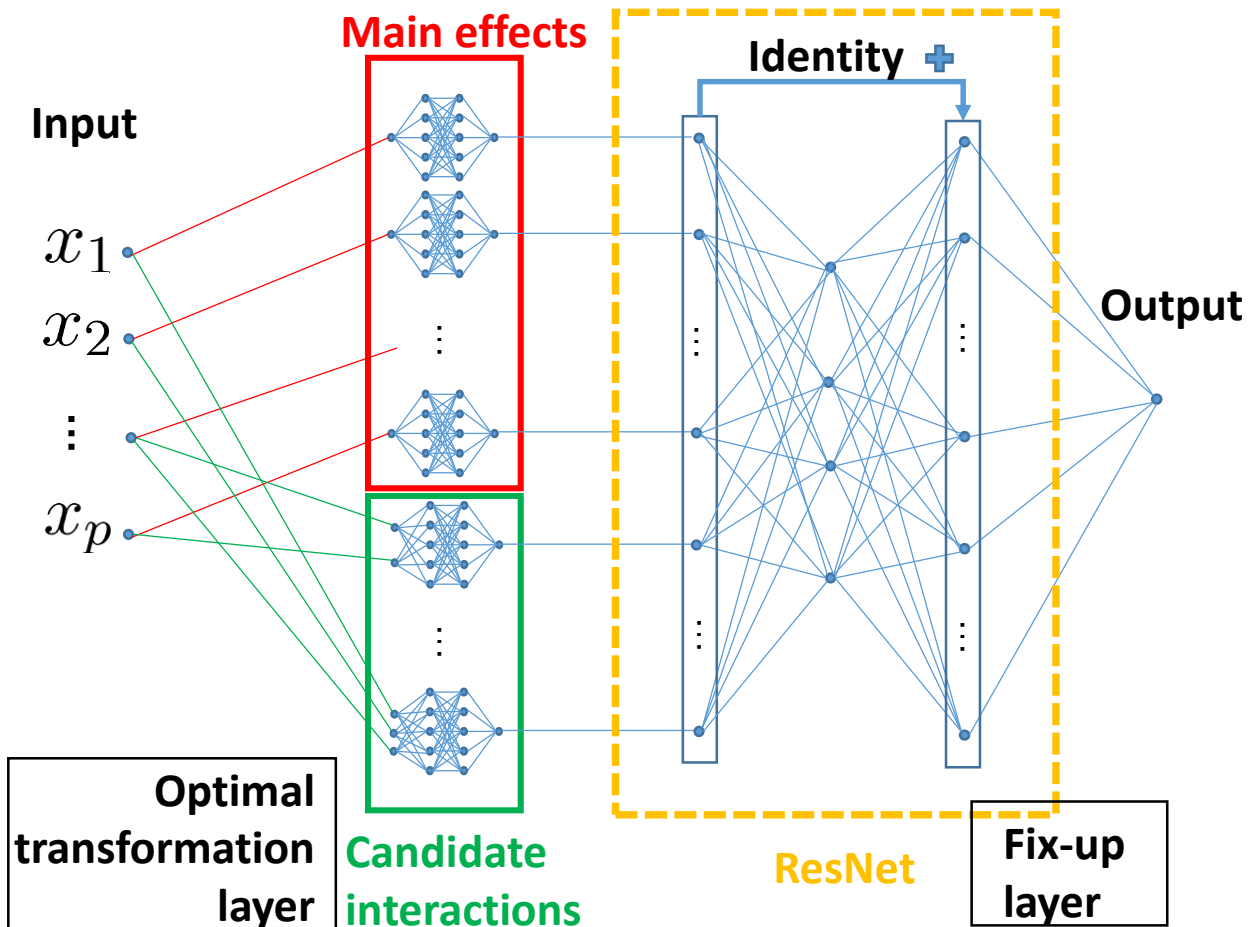

Supplement: supplementary_material [file attachment]

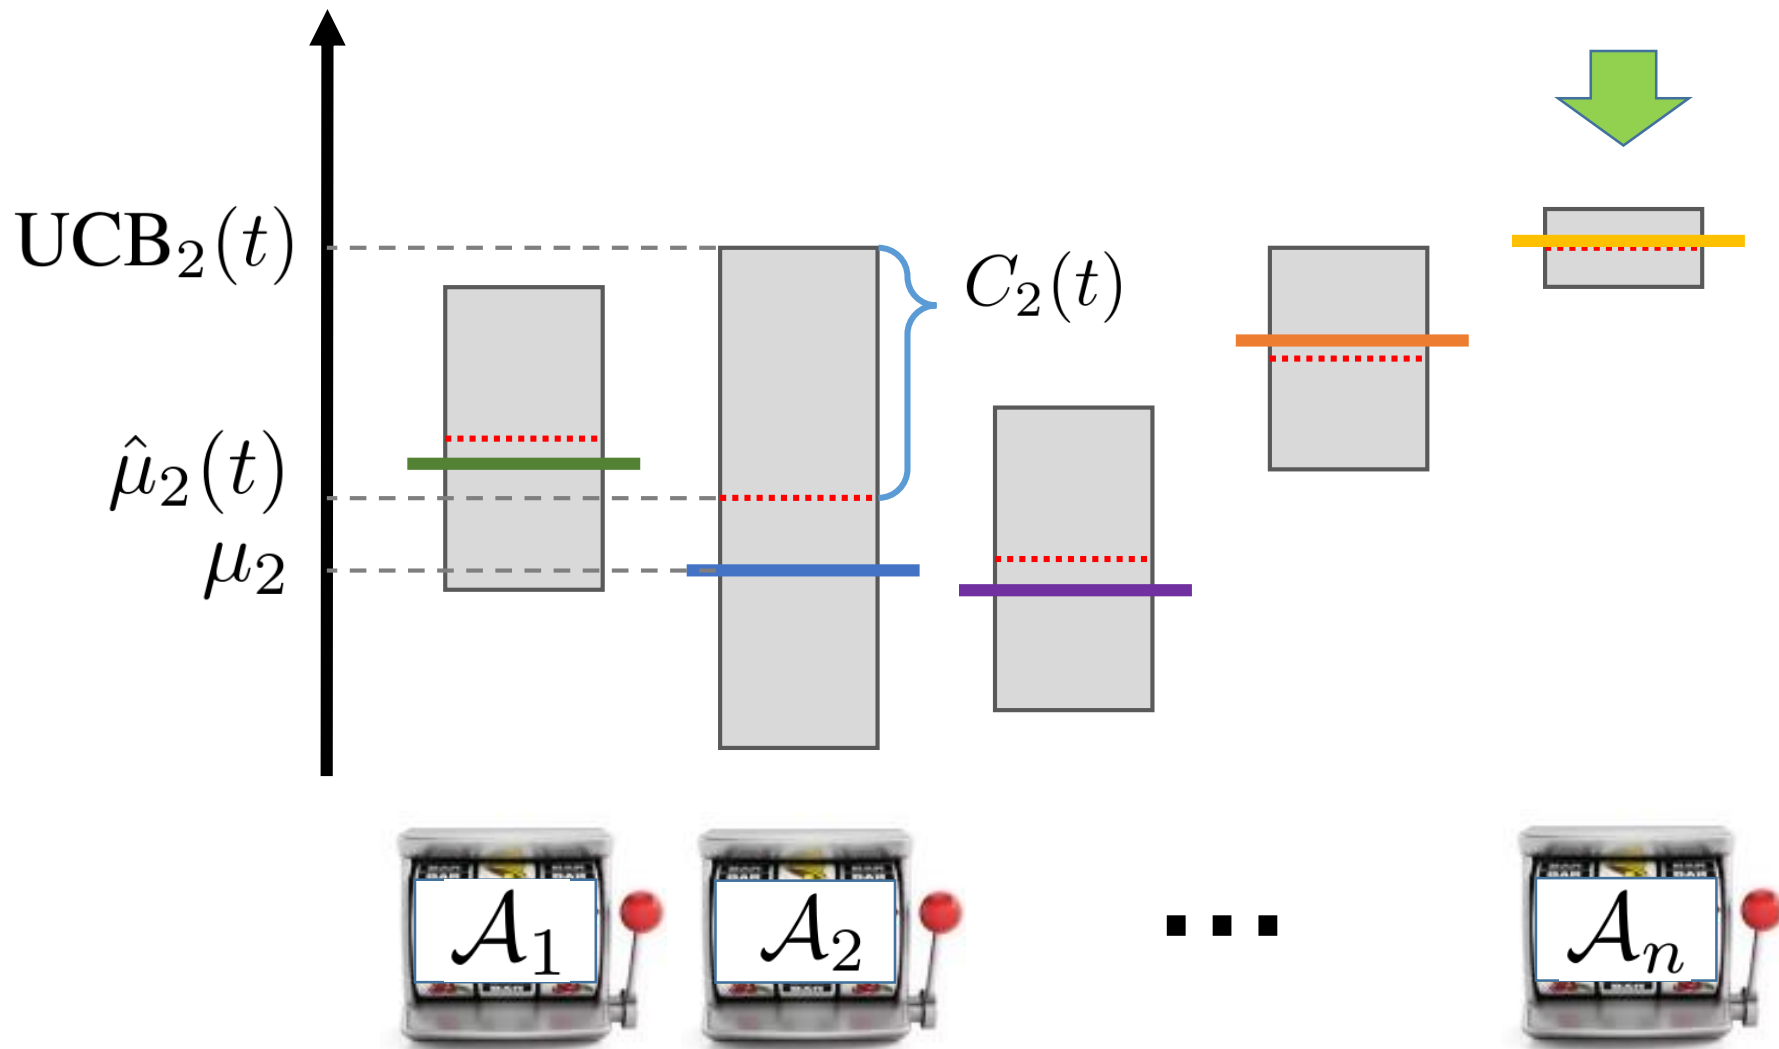

Supplement: supplementary_material [file attachment]

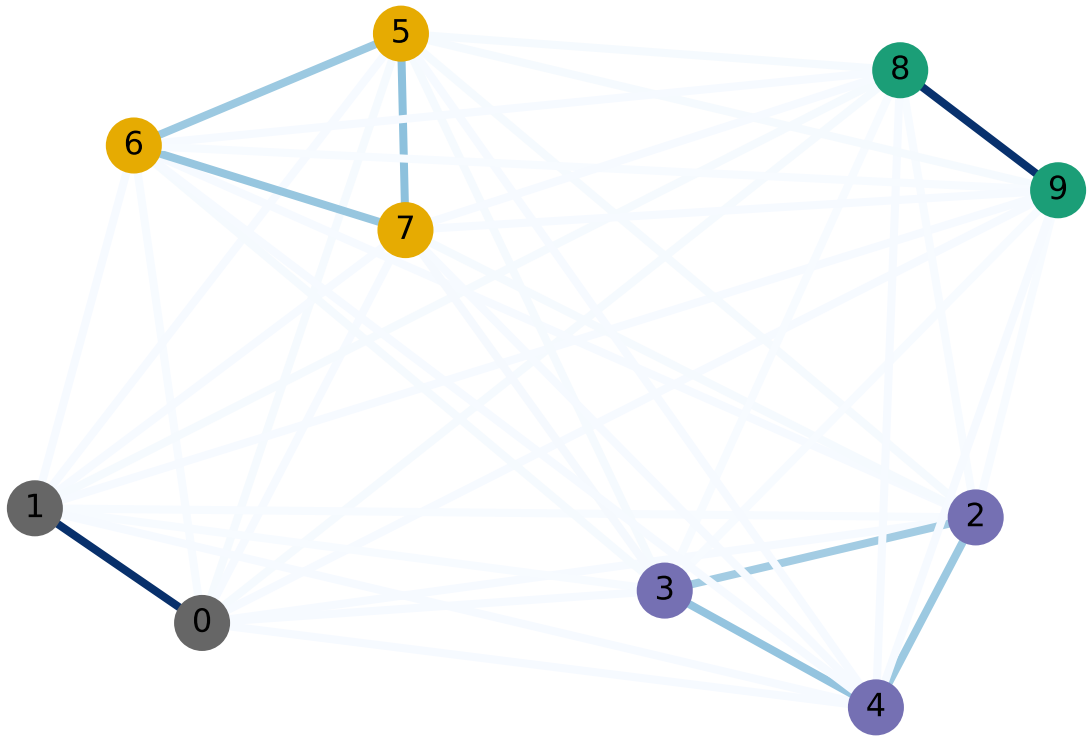

Supplement: supplementary_material [file attachment]

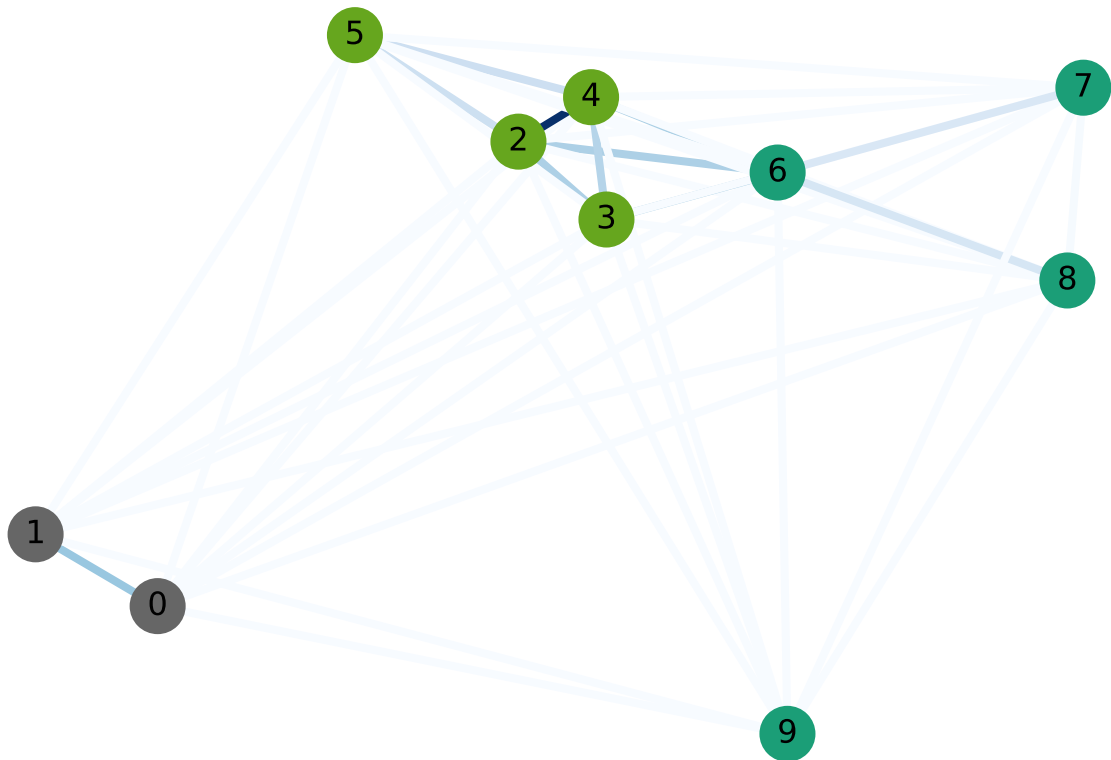

Supplement: supplementary_material [file attachment]
